# Supplementary material for: RNPC1 enhances progesterone receptor functions by regulating its mRNA stability in breast cancer
Source: PubMed Central journal article supplement (PMC5369970; doi:10.18632/oncotarget.12016), 2016-09-14
Supplement: oncotarget-08-16387-s001.pdf [file oncotarget-08-16387-s001.pdf]

## RNPC1 enhances progesterone receptor functions by regulating its mRNA stability in breast cancer

### SUPPLEMENTARY FIGURES AND TABLES

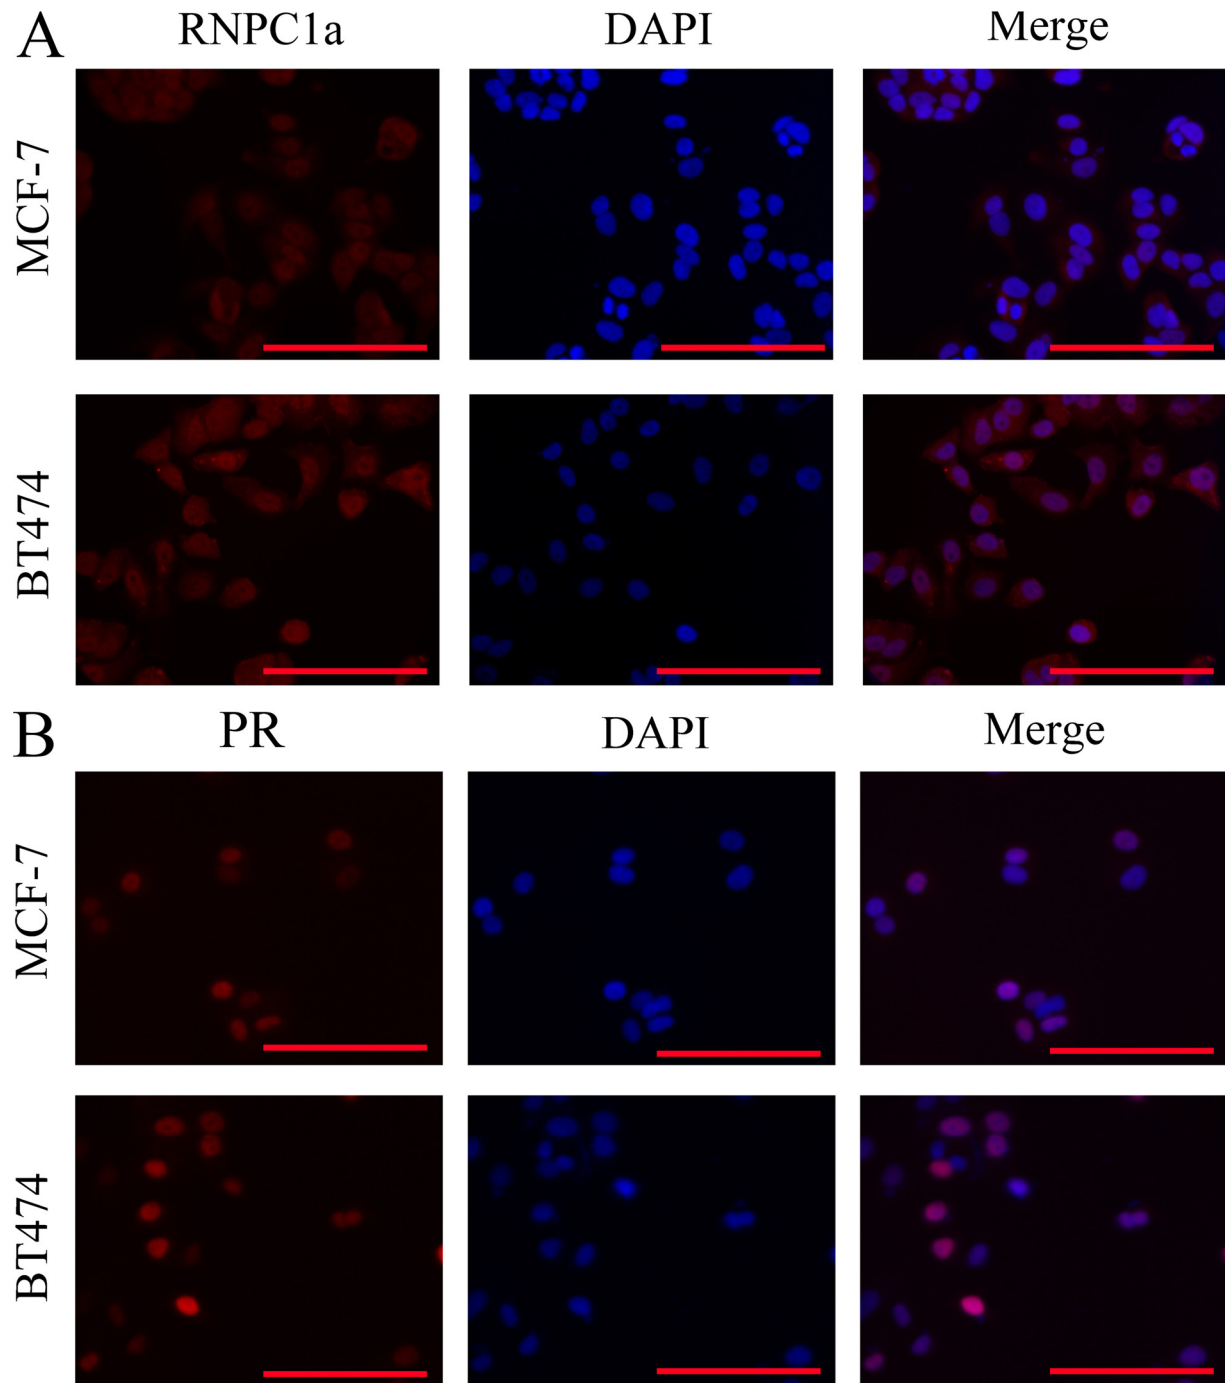

**Supplementary Figure S1: RNPC1a and PR cellular localization in breast cancer cells with immunofluorescence. A.** In MCF-7 and BT474 cells, RNPC1a was mainly expressed in the nucleus and cytoplasm. **B.** PR was mainly expressed in the nucleus in MCF-7 and BT474 cells.

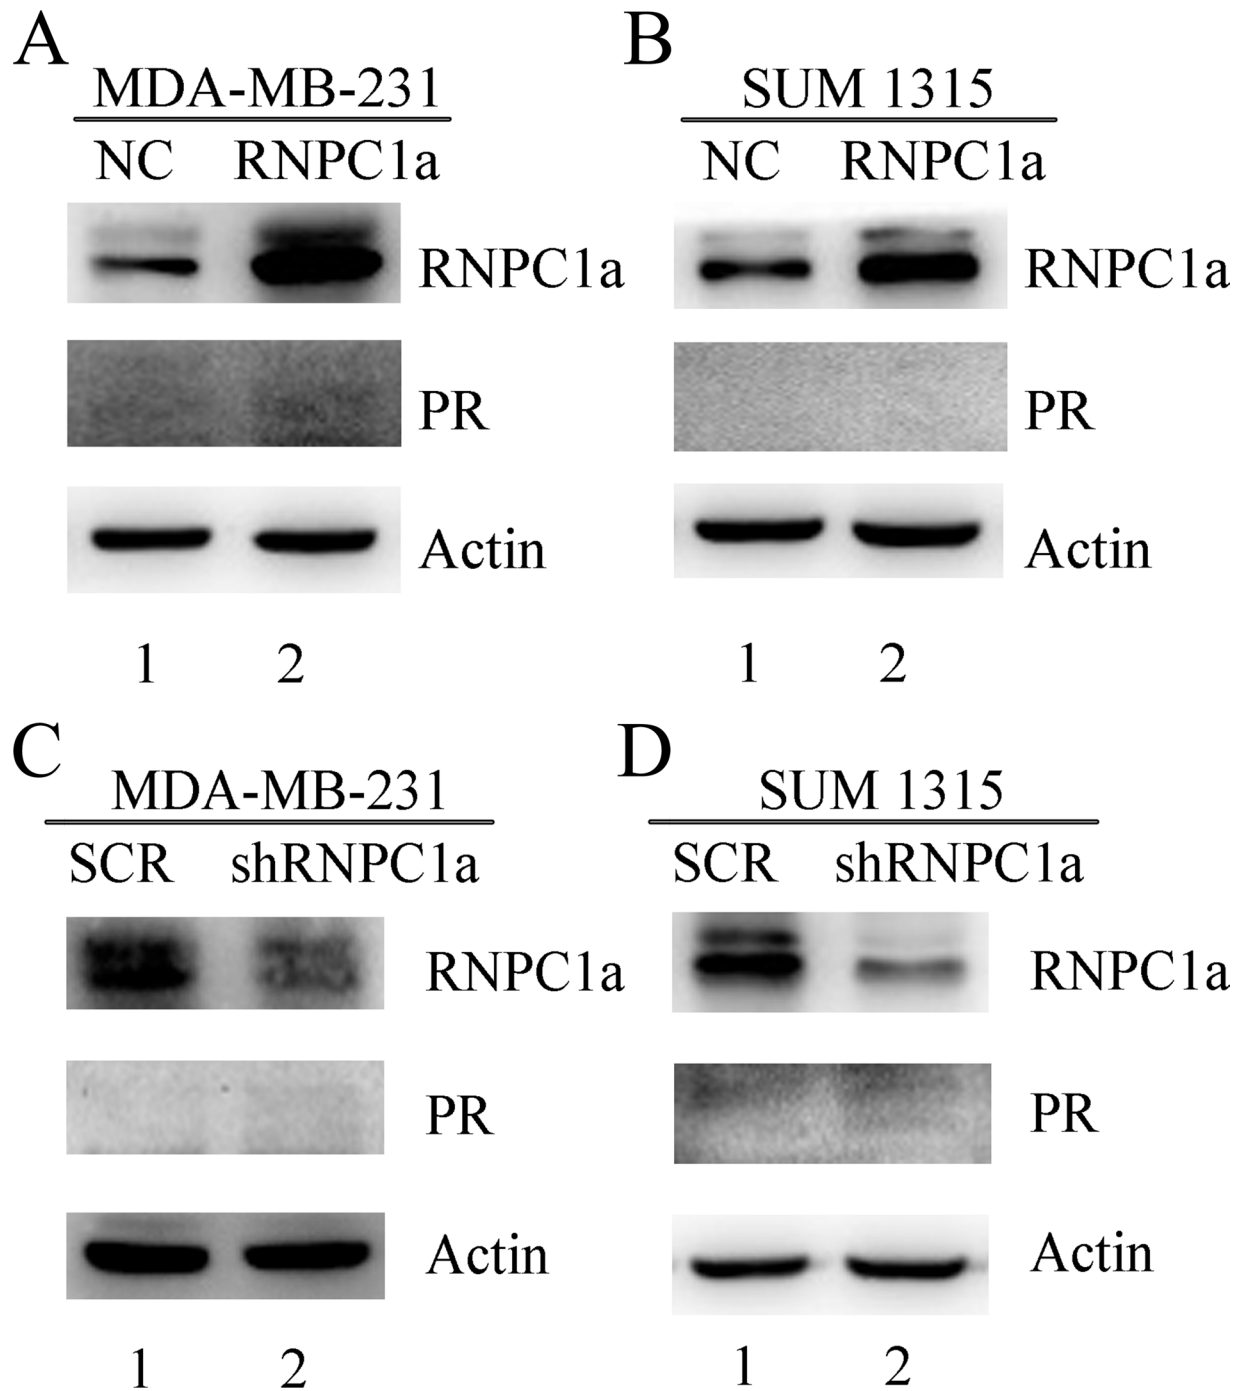

**Supplementary Figure S2: RNPC1 couldn't affect PR expression in PR negative breast cancer cells.** **A, B.** The expression of PR was not influenced by RNPC1a overexpression in PR negative breast cancers. MDA-MB-231 and SUM 1315 were transfected with lentivirus containing either control luciferase (NC) or RNPC1a overexpression (RNPC1a). Western blot was used to analyze the expression of RNPC1a and PR. **C, D.** The expression of PR was not influenced by RNPC1a knockdown. MDA-MB-231 and SUM 1315 were transfected with a control (SCR) and RNPC1a knockdown (shRNPC1a) lentivirus. Western blot was used to analyze the expression of RNPC1a and PR.

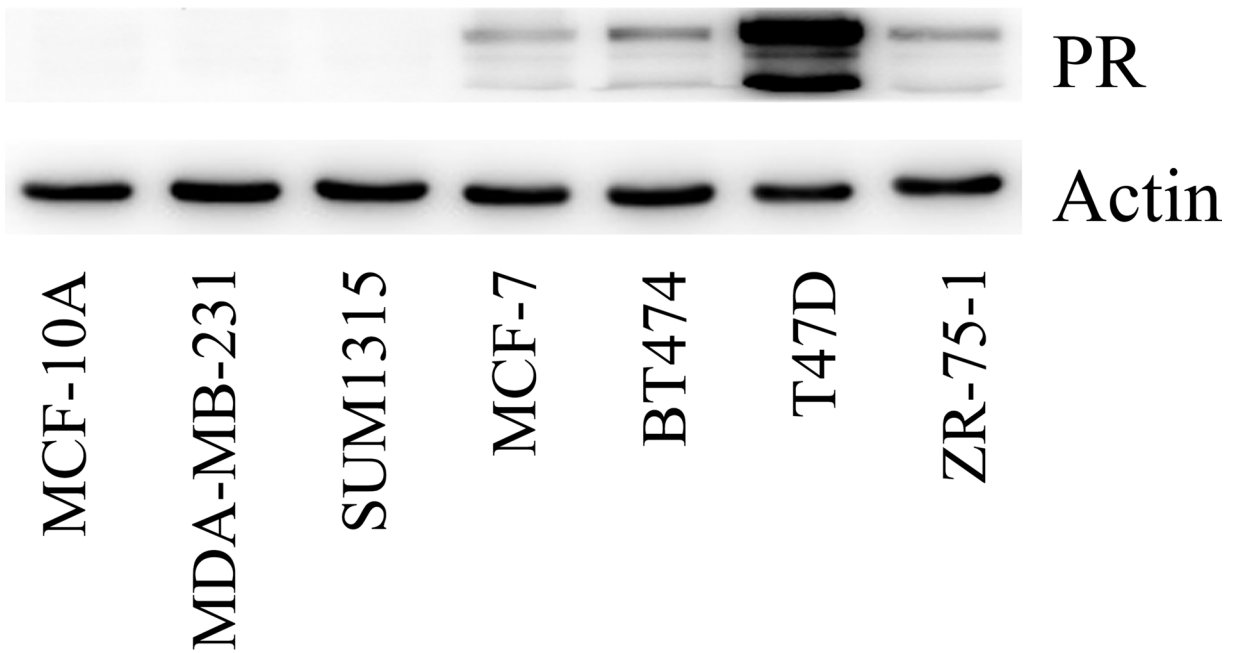

**Supplementary Figure S3: PR expression in different cell lines.** Western blot was used to detect PR expression in different cell lines. Normal breast cell MCF-10A and breast cancer cells MDA-MB-231 and SUM 1315 were PR negative. Breast cancer cells MCF-7, BT474, T47D and ZR-75-1 were PR positive. Among these PR positive cells, we chose MCF-7 and BT474 in our study, both of which expressed PR neither too higher nor too lower.

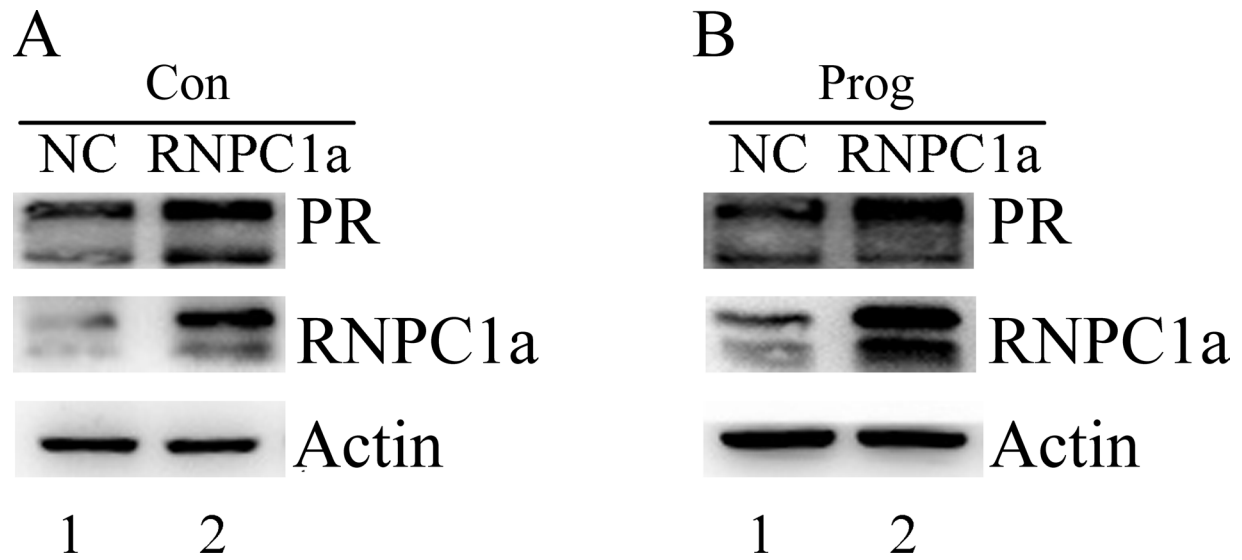

**Supplementary Figure S4: RNPC1a and PR expression in NOD/SCID mice tumor tissue.** A. Without progesterone, RNPC1a and PR expression in NOD/SCID mice tumor tissue was both upregulated as RNPC1a was overexpression. B. With progesterone, RNPC1a and PR expression in NOD/SCID mice tumor tissue was also both upregulated as RNPC1a was overexpression.

**Supplementary Table S1: Sequence of REMSA probes**

See Supplementary File: 1
